# Supplementary material for: Scotopic and Photopic Conventional Visual Acuity and Hyperacuity – Binocular Summation
Source: PubMed Central journal article supplement — Transl Vis Sci Technol. 2024 Apr 19;13(4):25. doi: 10.1167/tvst.13.4.25 (PMC11037493; doi:10.1167/tvst.13.4.25), 2024-04-19
Supplement: tvst-13-4-25_s001.pdf [file tvst-13-4-25_s001.pdf]

Supplementary

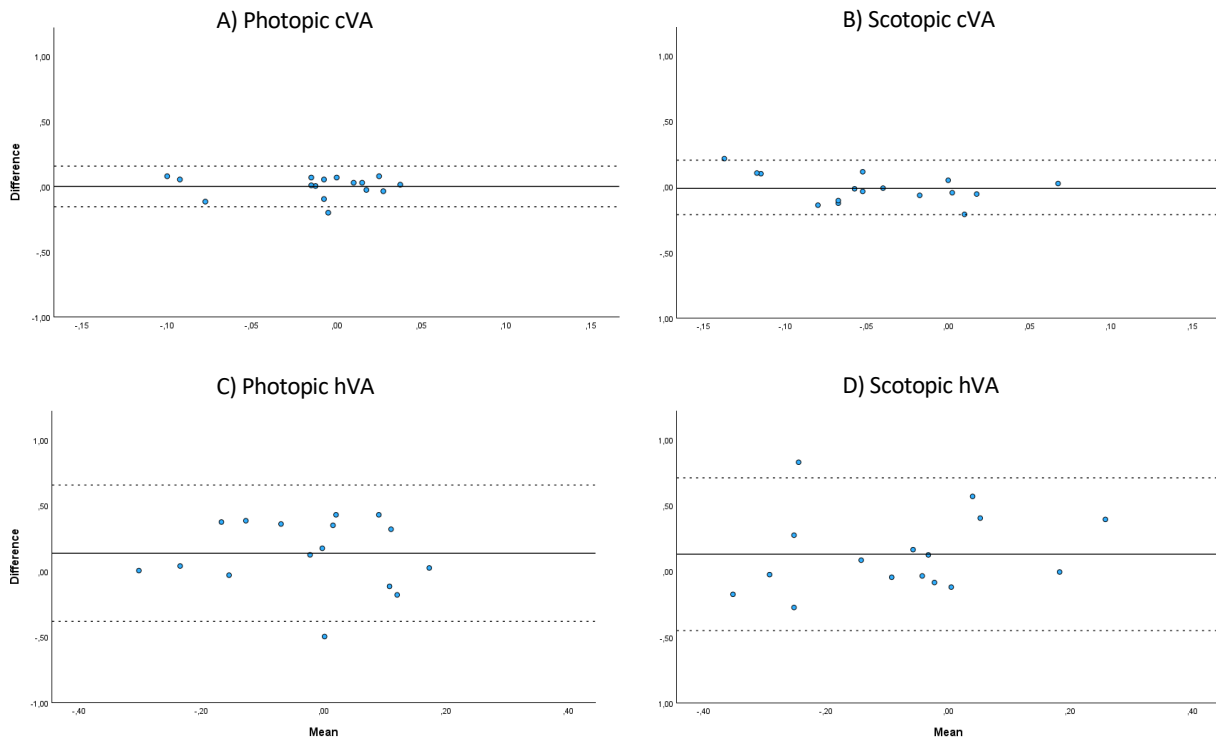

**Figure 1 supplementary.** Bland-Altman analysis for conventional (cVA) and hyperacuity (hVA) visual acuity values [logMAR] for the measurement between 2 days.
