# Supplementary material for: Scotopic and Photopic Conventional Visual Acuity and Hyperacuity – Binocular Summation
Source: PubMed Central journal article supplement — Transl Vis Sci Technol. 2024 Apr 19;13(4):25. doi: 10.1167/tvst.13.4.25 (PMC11037493; doi:10.1167/tvst.13.4.25), 2024-04-19
Supplement: tvst-13-4-25_s002.pdf [file tvst-13-4-25_s002.pdf]

Supplementary

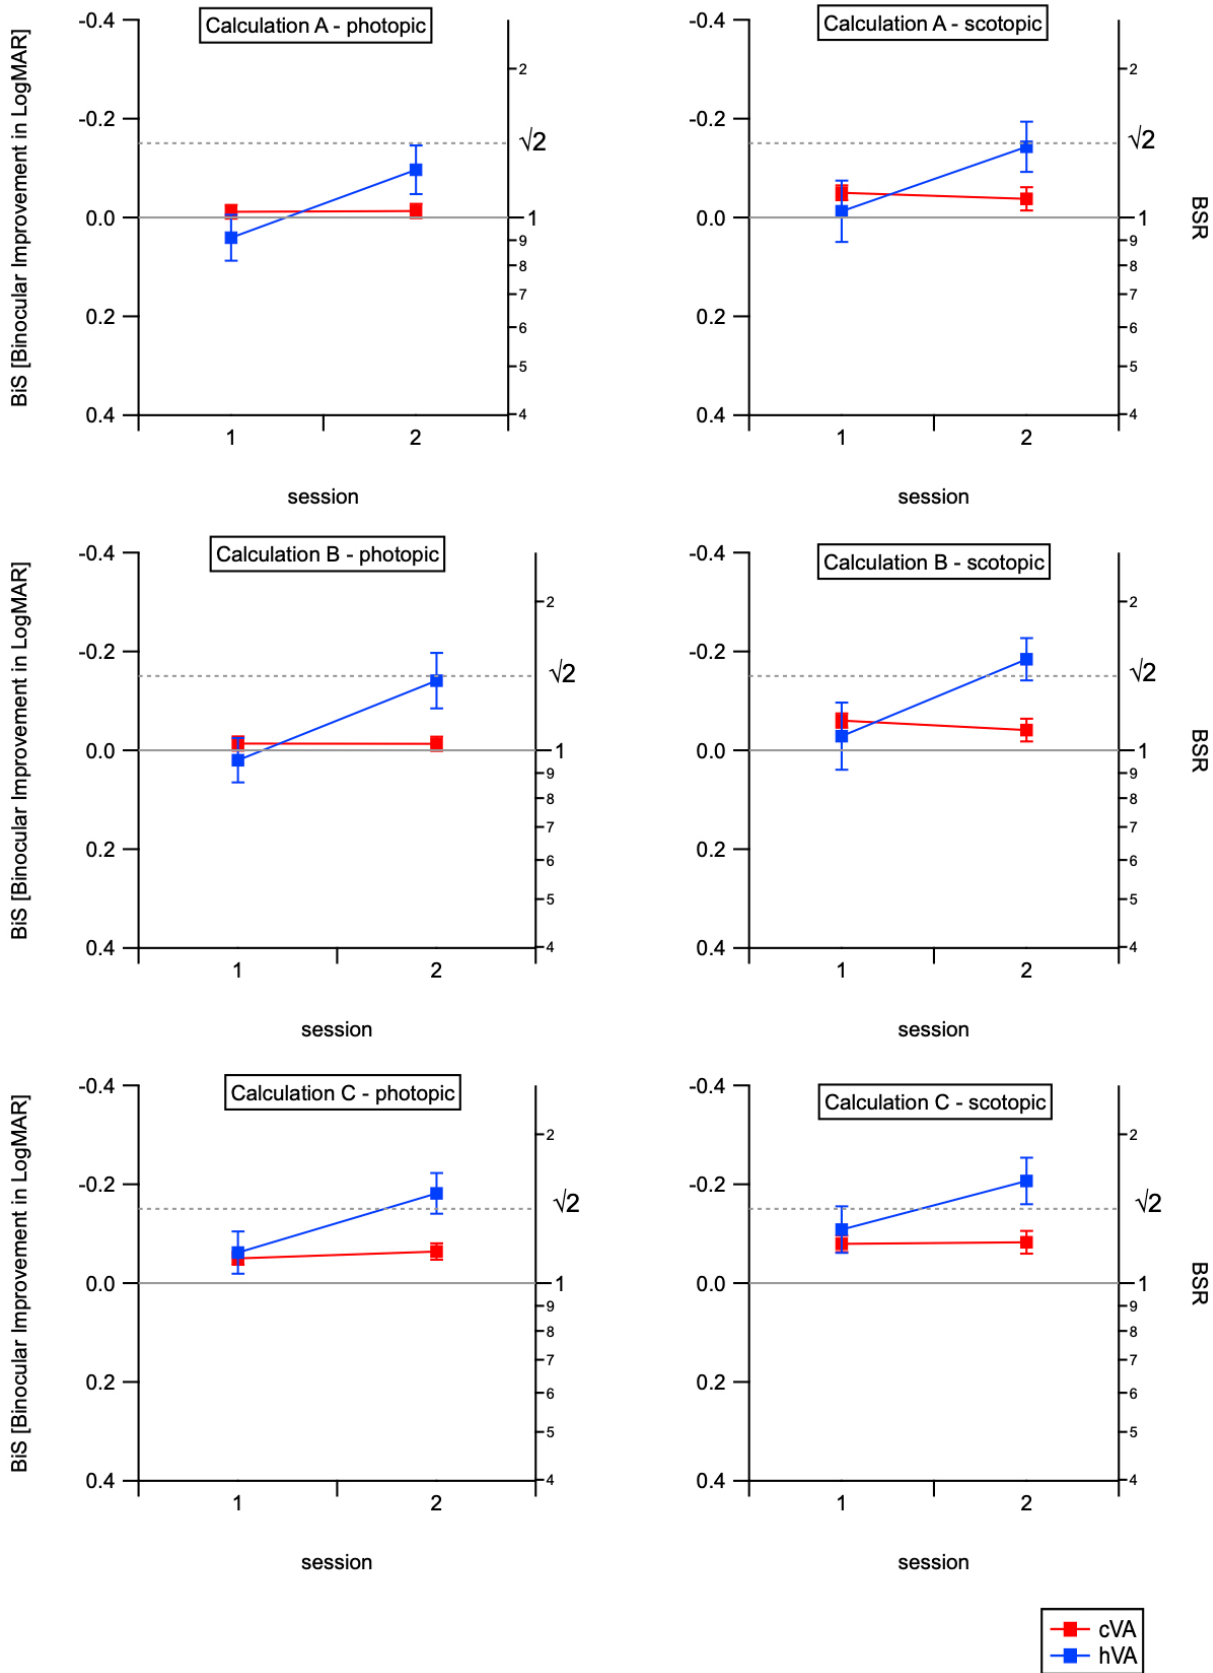

**Figure 2 supplementary. BiS comparison between sessions.** For each of the three approaches (Calculation A-C) BiS is shown for both luminance conditions as binocular improvement (BiS) in logMAR and BSR. Group average and SEM are displayed for cVA and hVA on both days.
