# Supplementary material for: Scotopic and Photopic Conventional Visual Acuity and Hyperacuity – Binocular Summation
Source: PubMed Central journal article supplement — Transl Vis Sci Technol. 2024 Apr 19;13(4):25. doi: 10.1167/tvst.13.4.25 (PMC11037493; doi:10.1167/tvst.13.4.25), 2024-04-19
Supplement: tvst-13-4-25_s003.pdf [file tvst-13-4-25_s003.pdf]

Supplementary

**Table 1 supplementary.** A study participant values for binocular summation (BiS) calculations for photopic conventional visual acuity.

|       | Ocularity        |                  |           | BiS                           |                                                |                                                      |
|-------|------------------|------------------|-----------|-------------------------------|------------------------------------------------|------------------------------------------------------|
|       | OD               | OS               | OU        | Approach A<br>OU – better eye | Approach B<br>OU – Better eye across both days | Approach C<br>OU – (mean(OD + OS))                   |
| Day 1 | -<br>0.04        | -<br><b>0.05</b> | -<br>0.11 | $(-0.11) - (-0.05)$           | $(-0.11) - (-0.04)$                            | $(-0.11) - \left(\frac{(-0.04) + (-0.05)}{2}\right)$ |
| Day 2 | -<br><b>0.08</b> | -<br>0.05        | -<br>0.11 | $(-0.11) - (-0.08)$           | $(-0.11) - (-0.08)$                            | $(-0.11) - \left(\frac{(-0.08) + (-0.05)}{2}\right)$ |
| Mean  | -<br><b>0.06</b> | -<br>0.05        | -<br>0.11 |                               |                                                |                                                      |

Better OD vs OS values in bold. OU: both eyes; OD: right eye; OS: left eye. All values in logMAR
